# Supplementary material for: Isolations and characterization of highly water-soluble dimeric lanthanide citrate and malate with ethylenediaminetetraacetate
Source: Royal Society of Chemistry journal article supplement (doi:10.1039/c1dt11466b), 2011-11-25
Supplement: c1dt11466b.pdf [file c1dt11466b.pdf]

# Isolations and characterization of highly water-soluble dimeric lanthanide citrate and malate with ethylenediaminetetraacetate

Mao-Long Chen, Song Gao, Zhao-Hui Zhou\*

Department of Chemistry, College of Chemistry and Chemical Engineering, State Key Laboratory of Physical Chemistry of Solid Surfaces, Xiamen University, Xiamen, 361005, China, Fax: +86 592 2183047; Tel: +86 592 2184531; E-mail: zhzhou@xmu.edu.cn

|                                                                                                                                                    |    |
|----------------------------------------------------------------------------------------------------------------------------------------------------|----|
| <b>Fig. S1</b> Anion structure of dimeric complex $(\text{NH}_4)_8[\text{Ce}_2(\text{Hcit})_2(\text{edta})_2] \cdot 9\text{H}_2\text{O}$ (2) ..... | 1  |
| <b>Fig. S2</b> Anion structure of dimeric complex $\text{K}_8[\text{La}_2(\text{Hcit})_2(\text{edta})_2] \cdot 16\text{H}_2\text{O}$ (3) .....     | 1  |
| <b>Fig. S3</b> Anion structure of dimeric complex $\text{K}_6[\text{Ce}_2(\text{Hmal})_2(\text{edta})_2] \cdot 14\text{H}_2\text{O}$ (5) .....     | 1  |
| <b>Fig. S4</b> $^1\text{H}$ NMR spectrum of $(\text{NH}_4)_8[\text{La}_2(\text{Hcit})_2(\text{edta})_2] \cdot 9\text{H}_2\text{O}$ (1) .....       | 2  |
| <b>Fig. S5</b> $^1\text{H}$ NMR spectrum of $(\text{NH}_4)_8[\text{Ce}_2(\text{Hcit})_2(\text{edta})_2] \cdot 9\text{H}_2\text{O}$ (2) .....       | 2  |
| <b>Fig. S6</b> $^1\text{H}$ NMR spectrum of $\text{K}_8[\text{La}_2(\text{Hcit})_2(\text{edta})_2] \cdot 16\text{H}_2\text{O}$ (3) .....           | 3  |
| <b>Fig. S7</b> $^1\text{H}$ NMR spectrum of $\text{K}_6[\text{La}_2(\text{Hmal})_2(\text{edta})_2] \cdot 14\text{H}_2\text{O}$ (4) .....           | 3  |
| <b>Fig. S8</b> $^1\text{H}$ NMR spectrum of $\text{K}_6[\text{Ce}_2(\text{Hmal})_2(\text{edta})_2] \cdot 14\text{H}_2\text{O}$ (5) .....           | 4  |
| <b>Fig. S9</b> $^1\text{H}$ NMR spectrum of $\text{K}[\text{La}(\text{edta})(\text{H}_2\text{O})_3] \cdot 5\text{H}_2\text{O}$ .....               | 4  |
| <b>Fig. S10</b> $^1\text{H}$ NMR spectrum of $\text{K}[\text{Ce}(\text{edta})(\text{H}_2\text{O})_3] \cdot 5\text{H}_2\text{O}$ .....              | 5  |
| <b>Fig. S11</b> $^1\text{H}$ NMR spectrum of $\text{K}_4\text{edta}$ .....                                                                         | 5  |
| <b>Fig. S12</b> $^1\text{H}$ NMR spectrum of $\text{K}_3\text{Hcit}$ .....                                                                         | 6  |
| <b>Fig. S13</b> $^1\text{H}$ NMR spectrum of $\text{K}_2\text{Hmal}$ .....                                                                         | 6  |
| <b>Fig. S14</b> $^{13}\text{C}$ NMR spectrum of $(\text{NH}_4)_8[\text{La}_2(\text{Hcit})_2(\text{edta})_2] \cdot 9\text{H}_2\text{O}$ (1) .....   | 7  |
| <b>Fig. S15</b> $^{13}\text{C}$ NMR spectrum of $(\text{NH}_4)_8[\text{Ce}_2(\text{Hcit})_2(\text{edta})_2] \cdot 9\text{H}_2\text{O}$ (2) .....   | 7  |
| <b>Fig. S16</b> $^{13}\text{C}$ NMR spectrum of $\text{K}_8[\text{La}_2(\text{Hcit})_2(\text{edta})_2] \cdot 16\text{H}_2\text{O}$ (3) .....       | 8  |
| <b>Fig. S17</b> $^{13}\text{C}$ NMR spectrum of $\text{K}_6[\text{La}_2(\text{Hmal})_2(\text{edta})_2] \cdot 14\text{H}_2\text{O}$ (4) .....       | 8  |
| <b>Fig. S18</b> $^{13}\text{C}$ NMR spectrum of $\text{K}_6[\text{Ce}_2(\text{Hmal})_2(\text{edta})_2] \cdot 14\text{H}_2\text{O}$ (5) .....       | 9  |
| <b>Fig. S19</b> $^{13}\text{C}$ NMR spectrum of $\text{K}[\text{La}(\text{edta})(\text{H}_2\text{O})_3] \cdot 5\text{H}_2\text{O}$ .....           | 9  |
| <b>Fig. S20</b> $^{13}\text{C}$ NMR spectrum of $\text{K}[\text{Ce}(\text{edta})(\text{H}_2\text{O})_3] \cdot 5\text{H}_2\text{O}$ .....           | 10 |
| <b>Fig. S21</b> $^{13}\text{C}$ NMR spectrum of $\text{K}_4\text{edta}$ .....                                                                      | 10 |
| <b>Fig. S22</b> $^{13}\text{C}$ NMR spectrum of $\text{K}_3\text{Hcit}$ .....                                                                      | 11 |
| <b>Fig. S23</b> $^{13}\text{C}$ NMR spectrum of $\text{K}_2\text{Hmal}$ .....                                                                      | 11 |
| <b>Fig. S24</b> IR spectrum of $(\text{NH}_4)_8[\text{La}_2(\text{Hcit})_2(\text{edta})_2] \cdot 9\text{H}_2\text{O}$ (1) .....                    | 12 |
| <b>Fig. S25</b> IR spectrum of $(\text{NH}_4)_8[\text{Ce}_2(\text{Hcit})_2(\text{edta})_2] \cdot 9\text{H}_2\text{O}$ (2) .....                    | 12 |
| <b>Fig. S26</b> IR spectrum of $\text{K}_8[\text{La}_2(\text{Hcit})_2(\text{edta})_2] \cdot 16\text{H}_2\text{O}$ (3) .....                        | 13 |
| <b>Fig. S27</b> IR spectrum of $\text{K}_6[\text{La}_2(\text{Hmal})_2(\text{edta})_2] \cdot 14\text{H}_2\text{O}$ (4) .....                        | 13 |
| <b>Fig. S28</b> IR spectrum of $\text{K}_6[\text{La}_2(\text{Hmal})_2(\text{edta})_2] \cdot 14\text{H}_2\text{O}$ (5) .....                        | 14 |
| <b>Fig. S29</b> TG-DTG curve of $(\text{NH}_4)_8[\text{La}_2(\text{Hcit})_2(\text{edta})_2] \cdot 9\text{H}_2\text{O}$ (1) .....                   | 14 |
| <b>Fig. S30</b> TG-DTG curve of $(\text{NH}_4)_8[\text{Ce}_2(\text{Hcit})_2(\text{edta})_2] \cdot 9\text{H}_2\text{O}$ (2) .....                   | 15 |
| <b>Fig. S31</b> TG-DTG curve of $\text{K}_8[\text{La}_2(\text{Hcit})_2(\text{edta})_2] \cdot 16\text{H}_2\text{O}$ (3) .....                       | 15 |
| <b>Fig. S32</b> TG-DTG curve of $\text{K}_6[\text{La}_2(\text{Hmal})_2(\text{edta})_2] \cdot 14\text{H}_2\text{O}$ (4) .....                       | 16 |
| <b>Fig. S33</b> TG-DTG curve of $\text{K}_6[\text{La}_2(\text{Hmal})_2(\text{edta})_2] \cdot 14\text{H}_2\text{O}$ (5) .....                       | 16 |
| <b>Fig. S34</b> XRD of $\text{La}_2\text{O}_3$ .....                                                                                               | 17 |
| <b>Fig. S35</b> XRD of $\text{CeO}_2$ .....                                                                                                        | 17 |
| <b>Fig. S36</b> $\text{CH}_4$ conversions of OCM reaction over $\text{La}_2\text{O}_3$ .....                                                       | 18 |

|                                                                                                                                                                          |    |
|--------------------------------------------------------------------------------------------------------------------------------------------------------------------------|----|
| <b>Fig. S37</b> $C_2$ selectivity of OCM reaction over $La_2O_3$ .....                                                                                                   | 18 |
| <b>Fig. S38</b> $C_2$ yield of OCM reaction over $La_2O_3$ .....                                                                                                         | 19 |
| <b>Table S1</b> $^{13}C$ NMR spectral data (in ppm) of complexes <b>2</b> and <b>5</b> , $K_3Hcit$ , $K_4edta$ , $K_2Hmal$ and $K[Ce(edta)(H_2O)_3] \cdot 5H_2O^a$ ..... | 19 |



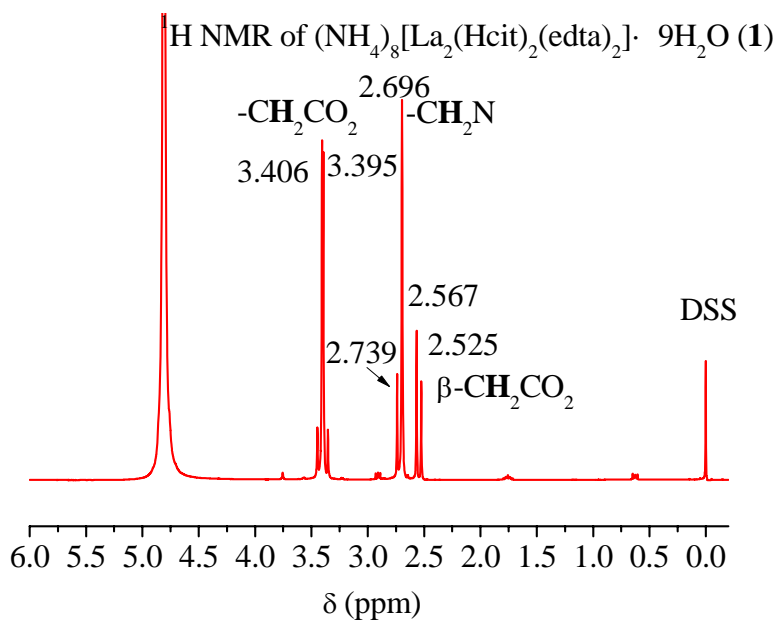

**Fig. S4**  $^1\text{H}$  NMR spectrum of  $(\text{NH}_4)_8[\text{La}_2(\text{Hcit})_2(\text{edta})_2] \cdot 9\text{H}_2\text{O}$  (1)

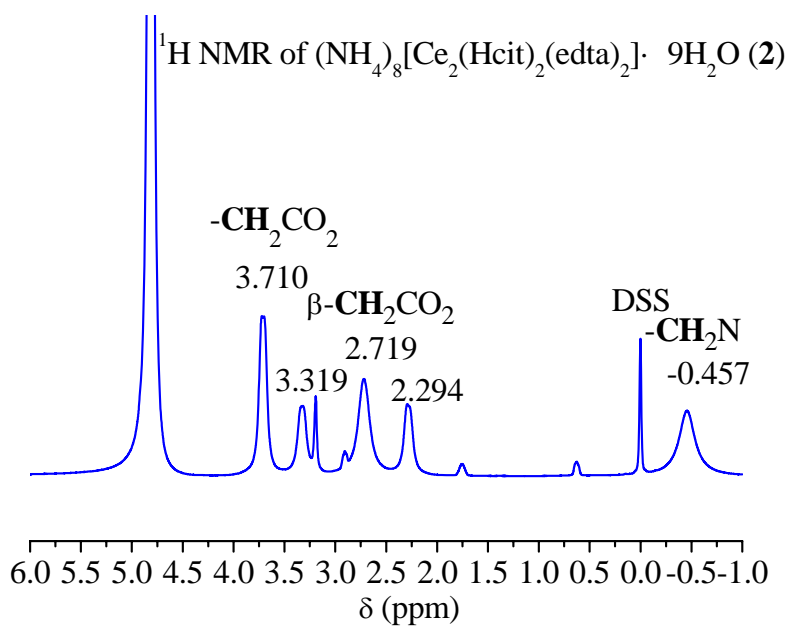

**Fig. S5**  $^1\text{H}$  NMR spectrum of  $(\text{NH}_4)_8[\text{Ce}_2(\text{Hcit})_2(\text{edta})_2] \cdot 9\text{H}_2\text{O}$  (2)

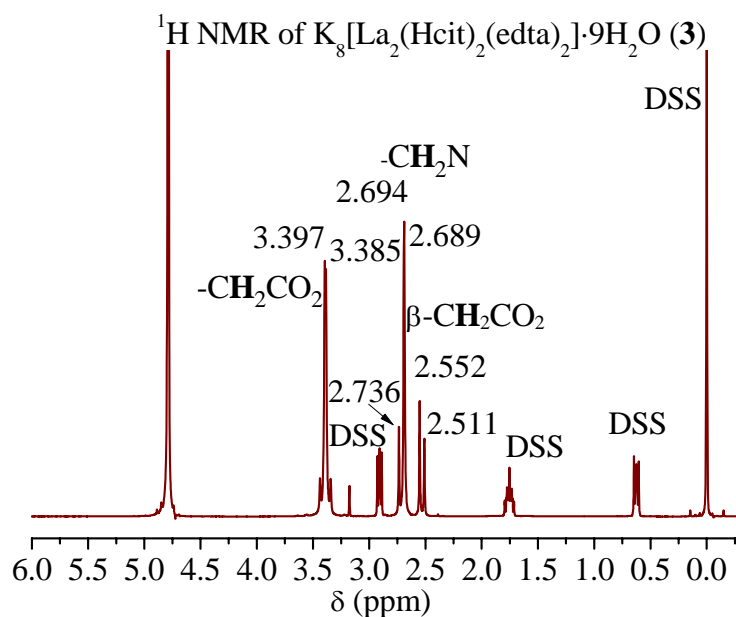

**Fig. S6**  $^1\text{H}$  NMR spectrum of  $\text{K}_8[\text{La}_2(\text{Hcit})_2(\text{edta})_2]\cdot 16\text{H}_2\text{O}$  (3)

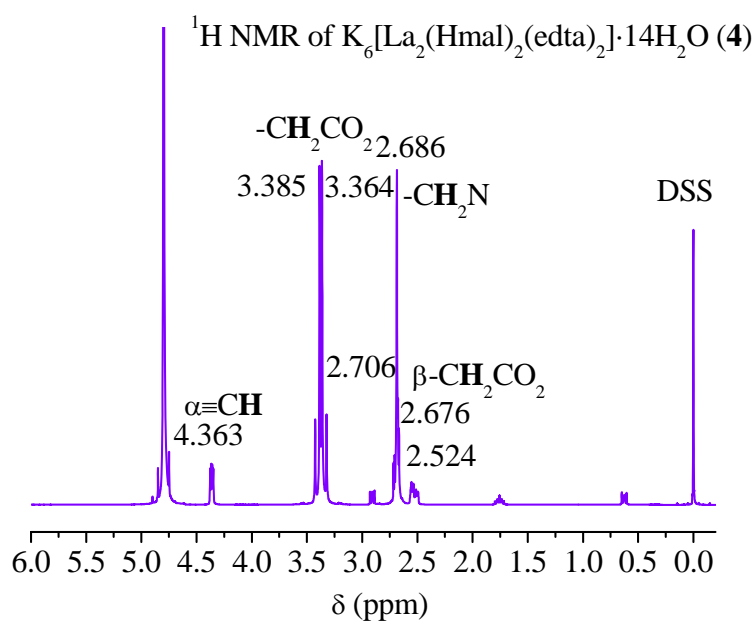

**Fig. S7**  $^1\text{H}$  NMR spectrum of  $\text{K}_6[\text{La}_2(\text{Hmal})_2(\text{edta})_2]\cdot 14\text{H}_2\text{O}$  (4)

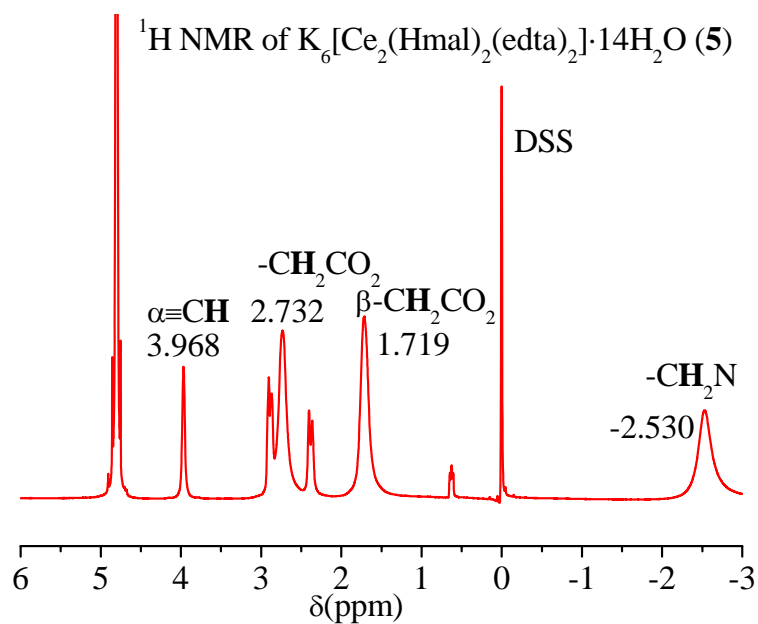

Fig. S8  $^1\text{H}$  NMR spectrum of  $\text{K}_6[\text{Ce}_2(\text{Hmal})_2(\text{edta})_2] \cdot 14\text{H}_2\text{O}$  (5)

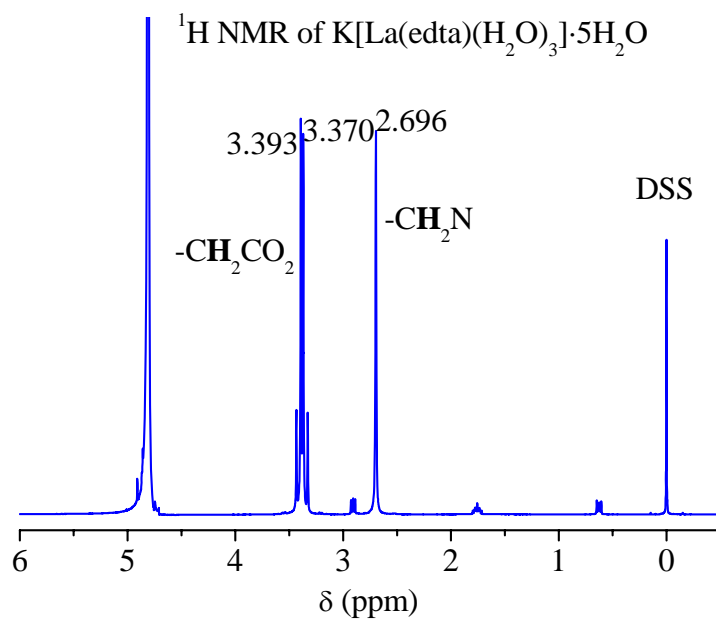

Fig. S9  $^1\text{H}$  NMR spectrum of  $\text{K}[\text{La}(\text{edta})(\text{H}_2\text{O})_3] \cdot 5\text{H}_2\text{O}$

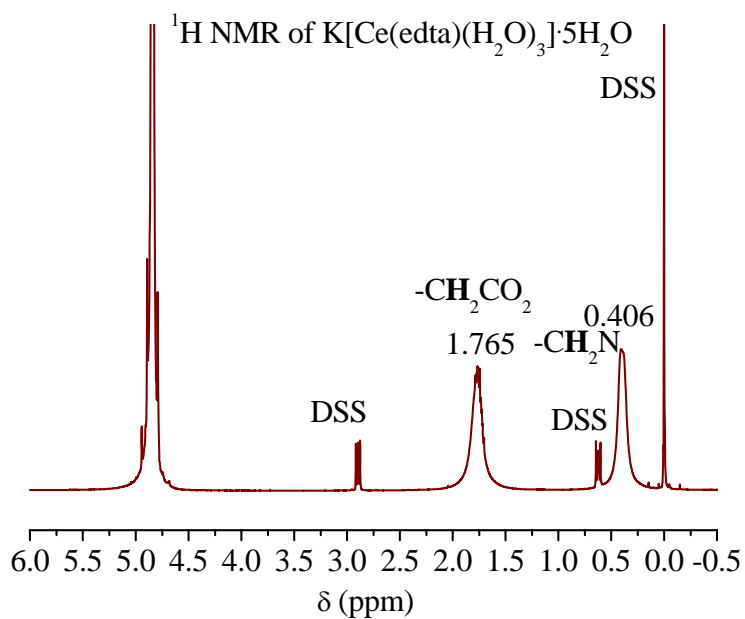

**Fig. S10** <sup>1</sup>H NMR spectrum of K[Ce(edta)(H<sub>2</sub>O)<sub>3</sub>].5H<sub>2</sub>O

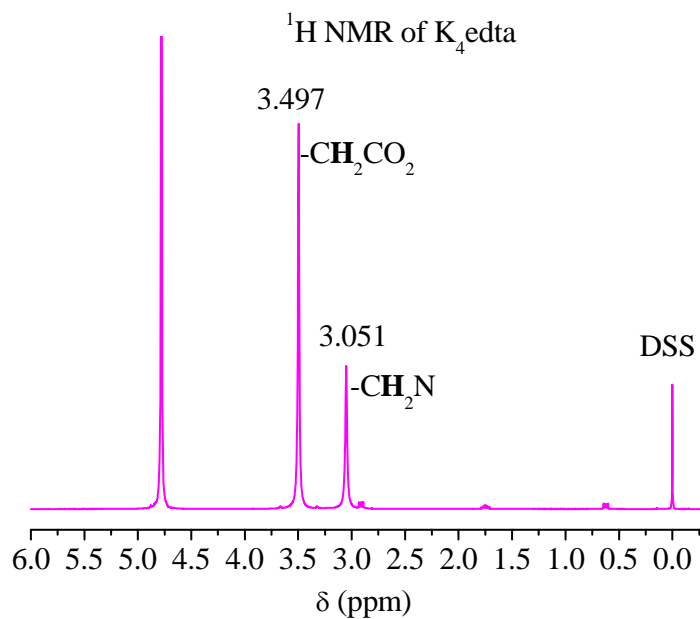

**Fig. S11** <sup>1</sup>H NMR spectrum of K<sub>4</sub>edta

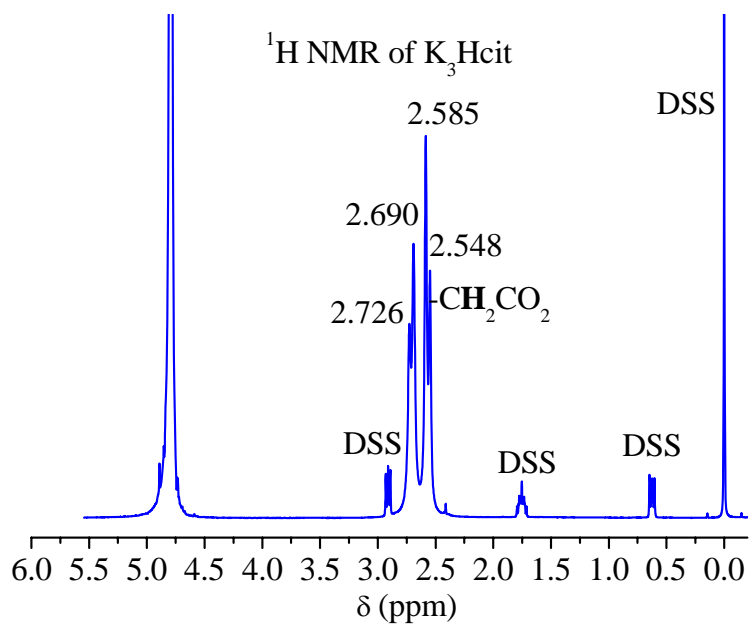

Fig. S12 <sup>1</sup>H NMR spectrum of K<sub>3</sub>Hcit

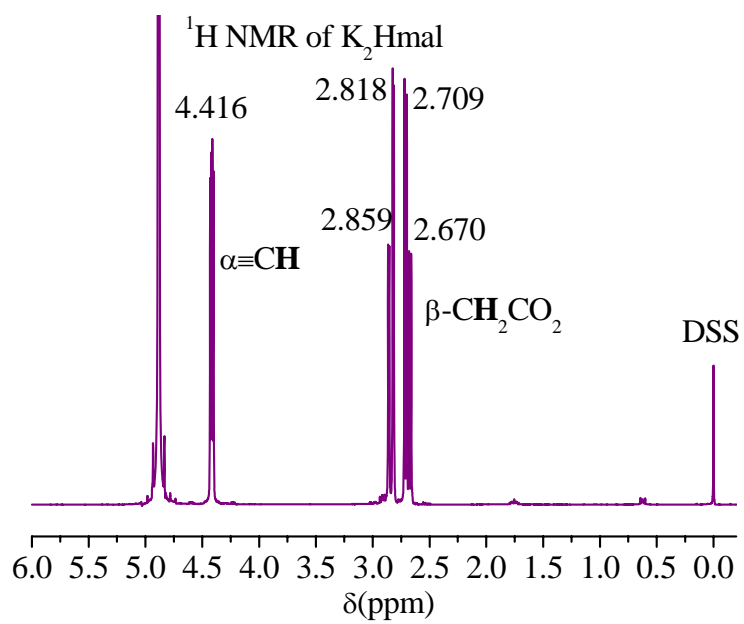

Fig. S13 <sup>1</sup>H NMR spectrum of K<sub>2</sub>Hmal



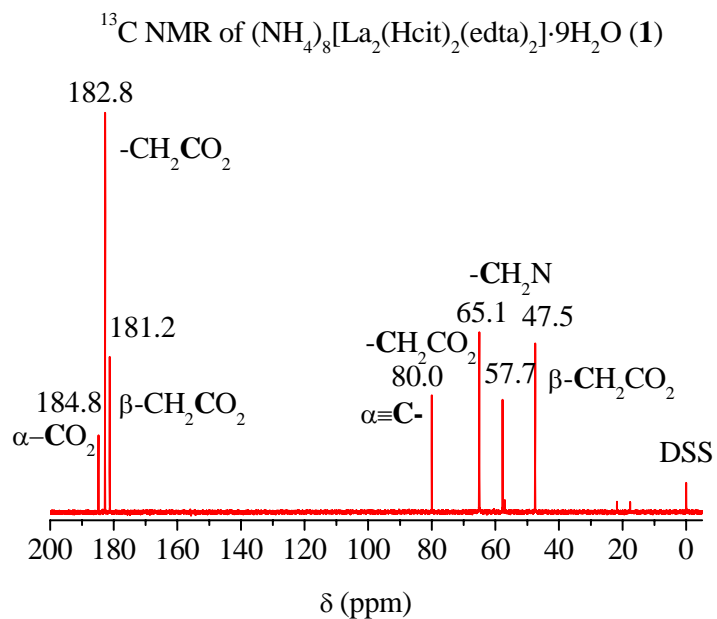

**Fig. S14**  $^{13}\text{C}$  NMR spectrum of  $(\text{NH}_4)_8[\text{La}_2(\text{Hcit})_2(\text{edta})_2]\cdot 9\text{H}_2\text{O}$  (1)

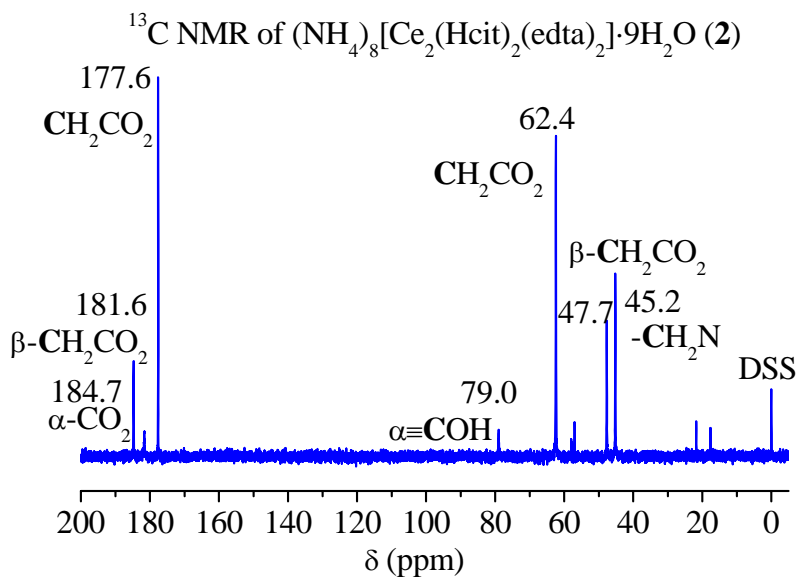

**Fig. S15**  $^{13}\text{C}$  NMR spectrum of  $(\text{NH}_4)_8[\text{Ce}_2(\text{Hcit})_2(\text{edta})_2]\cdot 9\text{H}_2\text{O}$  (2)

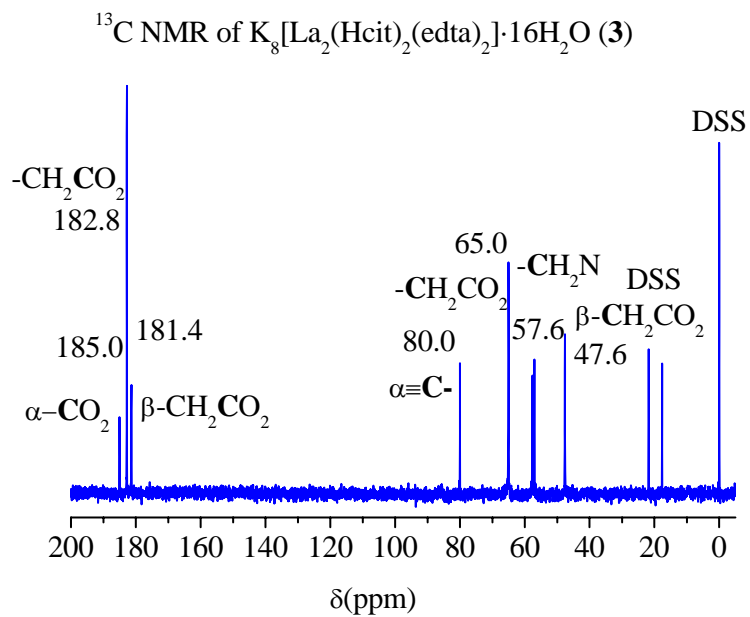

**Fig. S16**  $^{13}\text{C}$  NMR spectrum of  $\text{K}_8[\text{La}_2(\text{Hcit})_2(\text{edta})_2]\cdot 16\text{H}_2\text{O}$  (**3**)

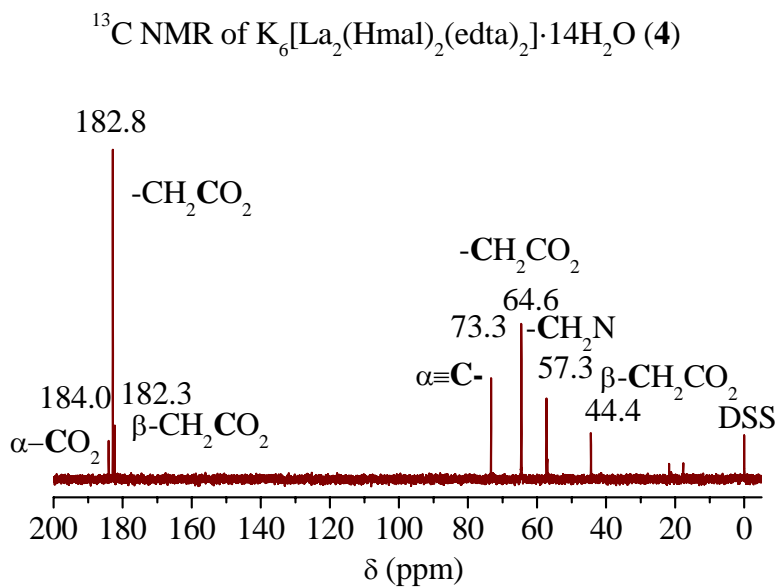

**Fig. S17**  $^{13}\text{C}$  NMR spectrum of  $\text{K}_6[\text{La}_2(\text{Hmal})_2(\text{edta})_2]\cdot 14\text{H}_2\text{O}$  (**4**)

$^{13}\text{C}$  NMR of  $\text{K}_6[\text{Ce}_2(\text{Hmal})_2(\text{edta})_2] \cdot 14\text{H}_2\text{O}$  (5)

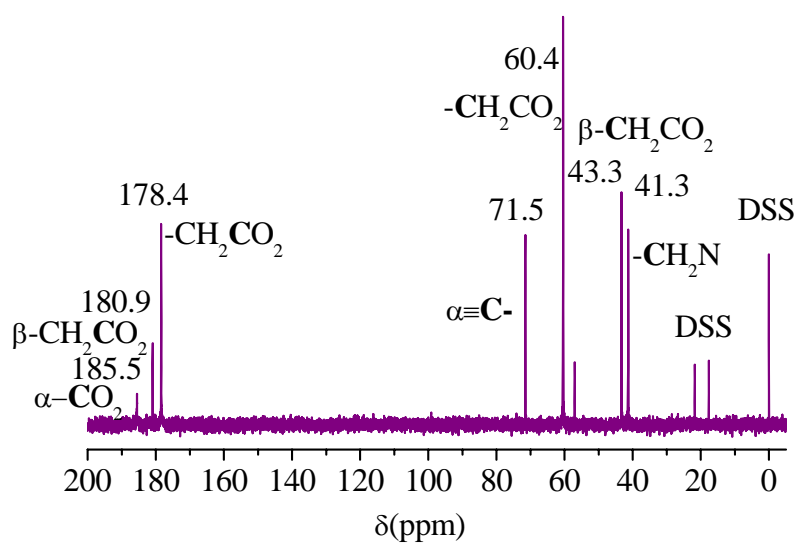

**Fig. S18**  $^{13}\text{C}$  NMR spectrum of  $\text{K}_6[\text{Ce}_2(\text{Hmal})_2(\text{edta})_2] \cdot 14\text{H}_2\text{O}$  (5)

$^1\text{H}$  NMR of  $\text{K}[\text{La}(\text{edta})(\text{H}_2\text{O})_3] \cdot 5\text{H}_2\text{O}$

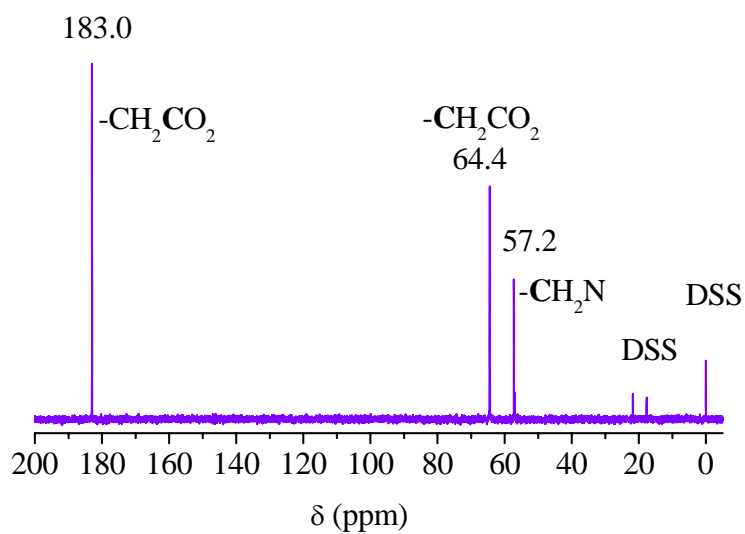

**Fig. S19**  $^{13}\text{C}$  NMR spectrum of  $\text{K}[\text{La}(\text{edta})(\text{H}_2\text{O})_3] \cdot 5\text{H}_2\text{O}$

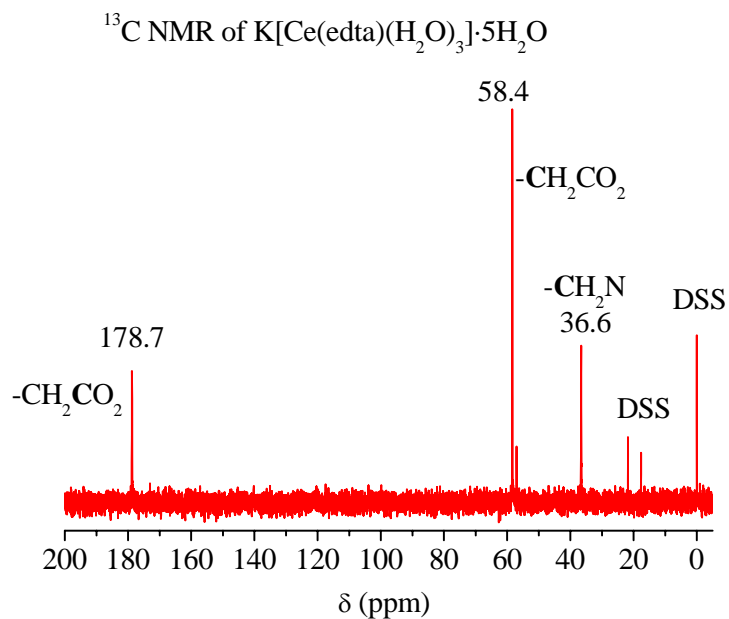

**Fig. S20**  $^{13}\text{C}$  NMR spectrum of  $\text{K}[\text{Ce}(\text{edta})(\text{H}_2\text{O})_3]\cdot 5\text{H}_2\text{O}$

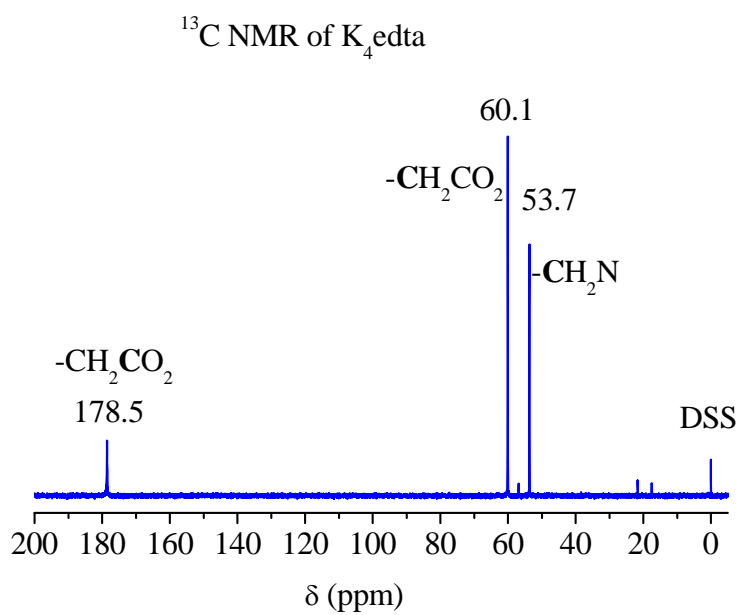

**Fig. S21**  $^{13}\text{C}$  NMR spectrum of  $\text{K}_4\text{edta}$

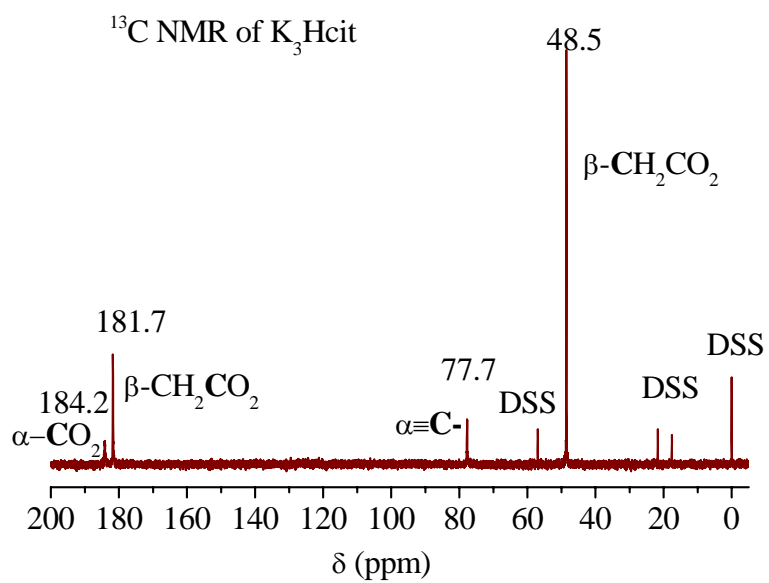

Fig. S22 <sup>13</sup>C NMR spectrum of K<sub>3</sub>Hcit

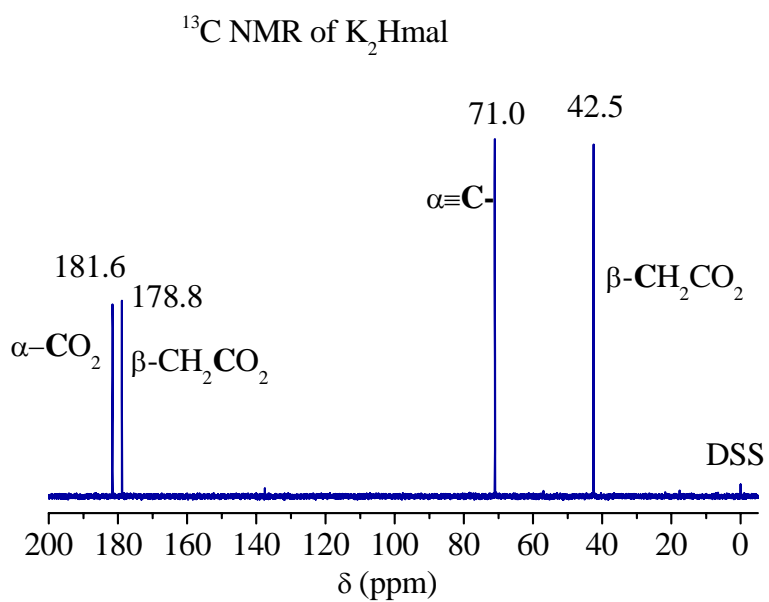

Fig. S23 <sup>13</sup>C NMR spectrum of K<sub>2</sub>Hmal

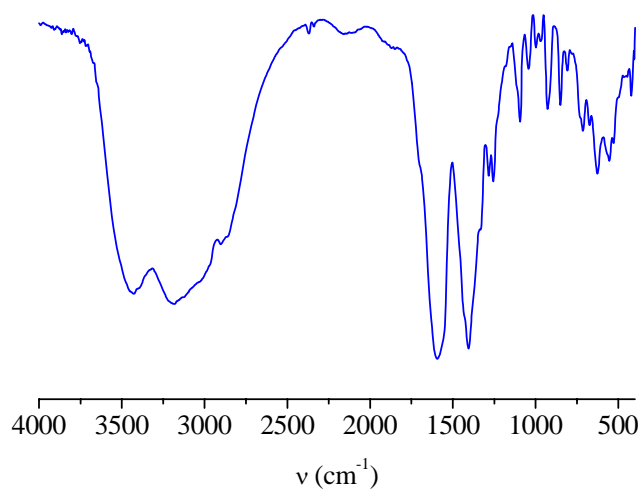

**Fig. S24** IR spectrum of  $(\text{NH}_4)_8[\text{La}_2(\text{Hcit})_2(\text{edta})_2]\cdot 9\text{H}_2\text{O}$  (**1**)

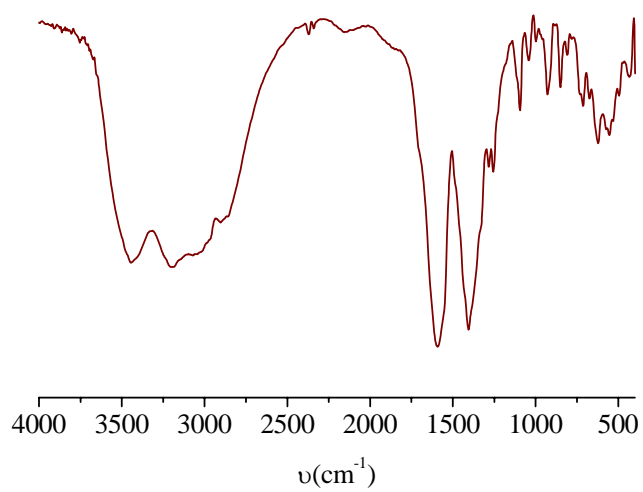

**Fig. S25** IR spectrum of  $(\text{NH}_4)_8[\text{Ce}_2(\text{Hcit})_2(\text{edta})_2]\cdot 9\text{H}_2\text{O}$  (**2**)

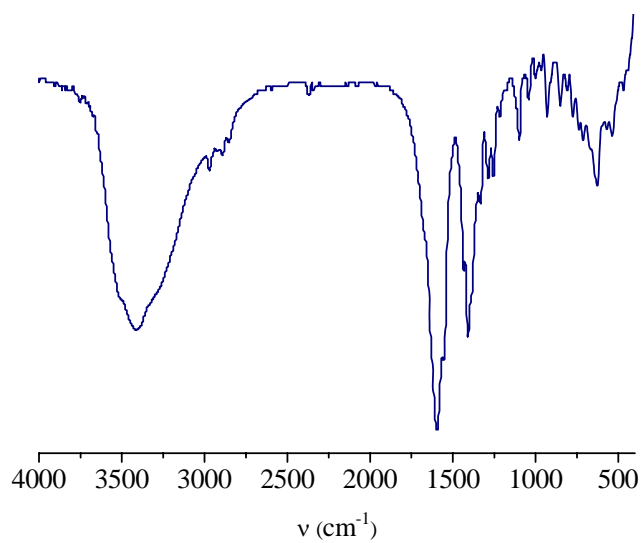

**Fig. S26** IR spectrum of  $K_8[La_2(Hcit)_2(edta)_2] \cdot 16H_2O$  (**3**)

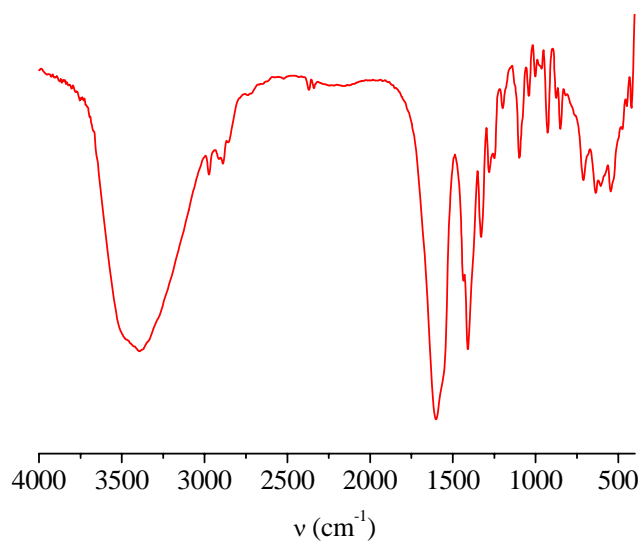

**Fig. S27** IR spectrum of  $K_6[La_2(Hmal)_2(edta)_2] \cdot 14H_2O$  (**4**)

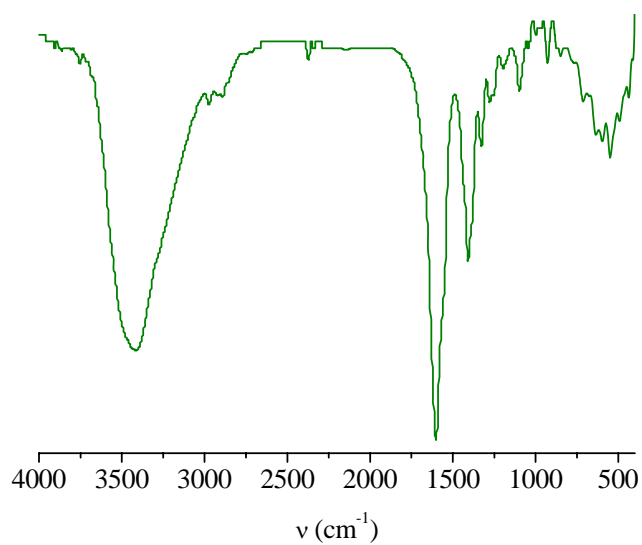

**Fig. S28** IR spectrum of  $K_6[La_2(Hmal)_2(edta)_2] \cdot 14H_2O$  (**5**)

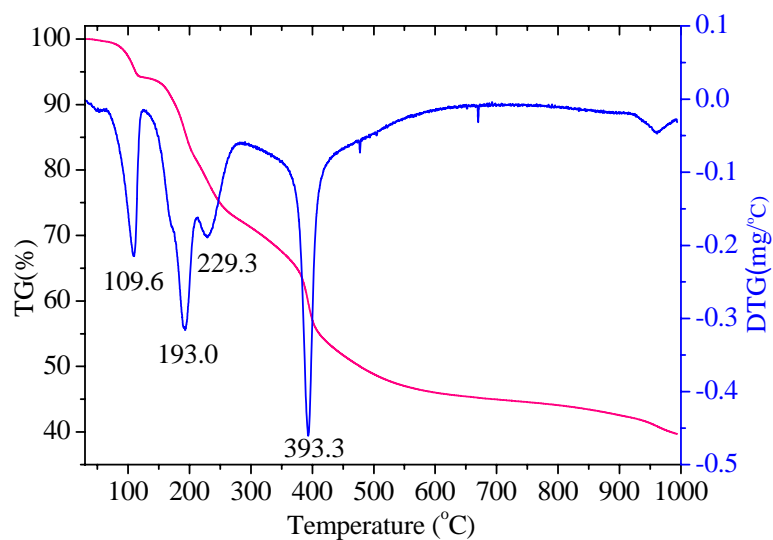

**Fig. S29** TG-DTG curve of  $(NH_4)_8[La_2(Hcit)_2(edta)_2] \cdot 9H_2O$  (**1**)



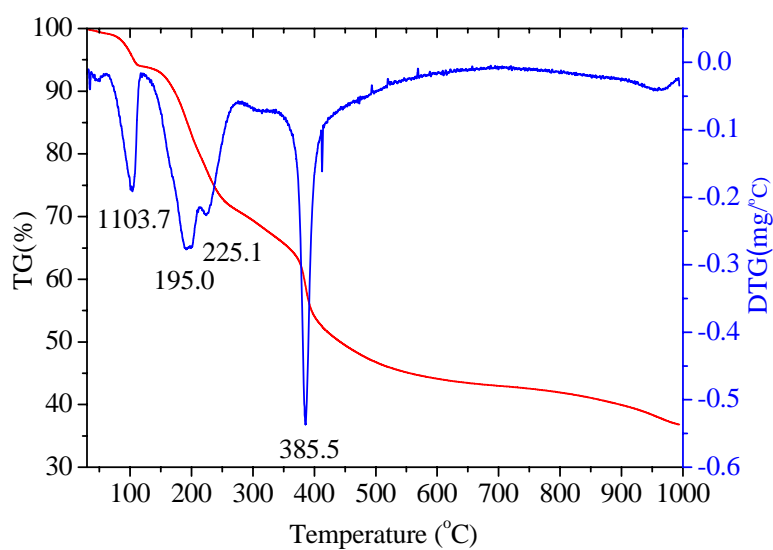

**Fig. S30** TG-DTG curve of  $(\text{NH}_4)_8[\text{Ce}_2(\text{Hcit})_2(\text{edta})_2] \cdot 9\text{H}_2\text{O}$  (**2**)

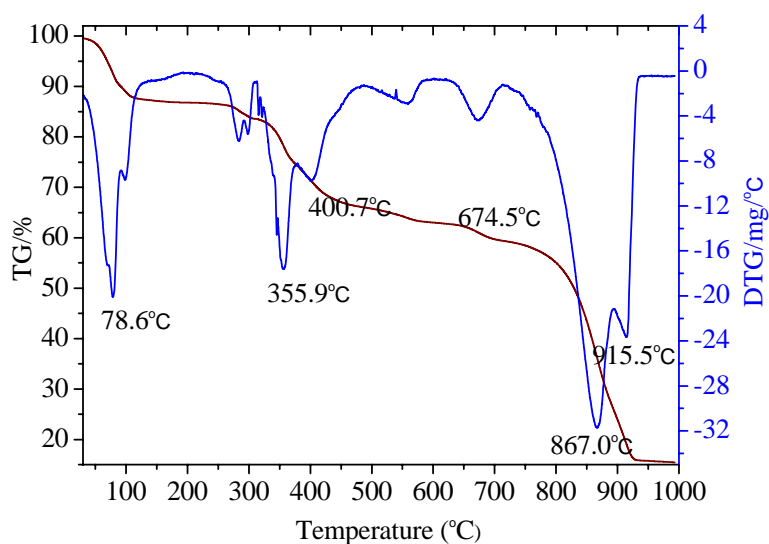

**Fig. S31** TG-DTG curve of  $\text{K}_8[\text{La}_2(\text{Hcit})_2(\text{edta})_2] \cdot 16\text{H}_2\text{O}$  (**3**)

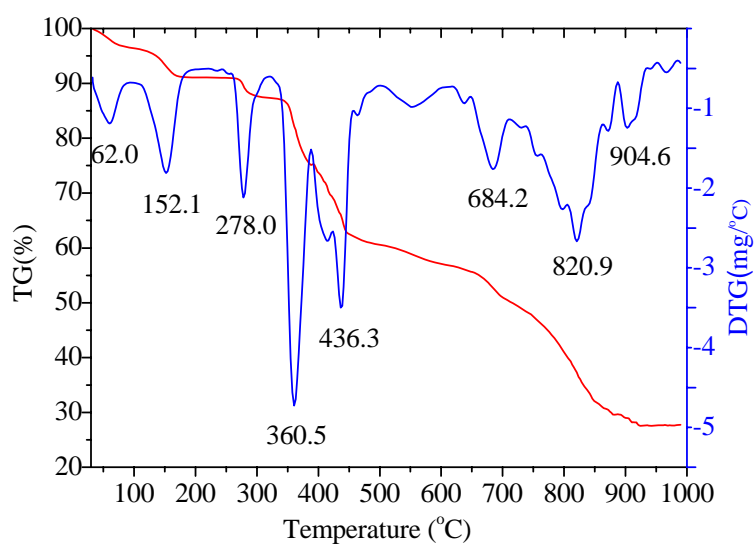

**Fig. S32** TG-DTG curve of  $K_6[La_2(Hmal)_2(edta)_2] \cdot 14H_2O$  (4)

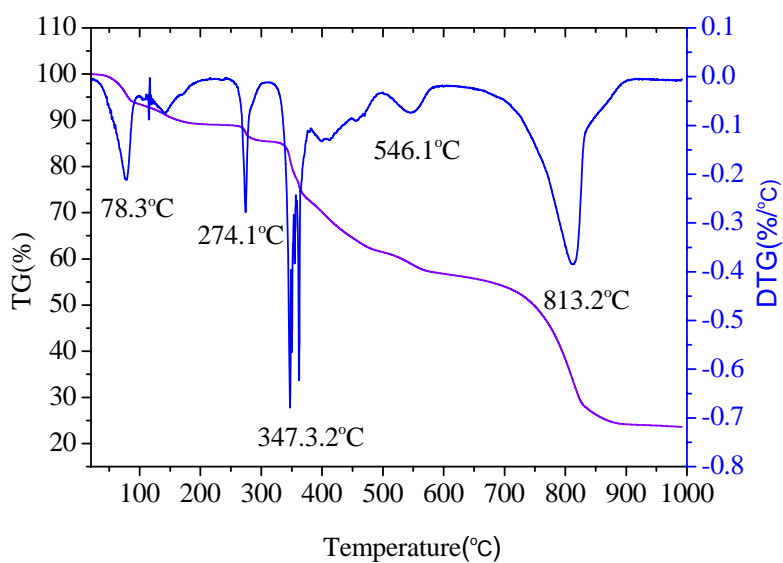

**Fig. S33** TG-DTG curve of  $K_6[La_2(Hmal)_2(edta)_2] \cdot 14H_2O$  (5)

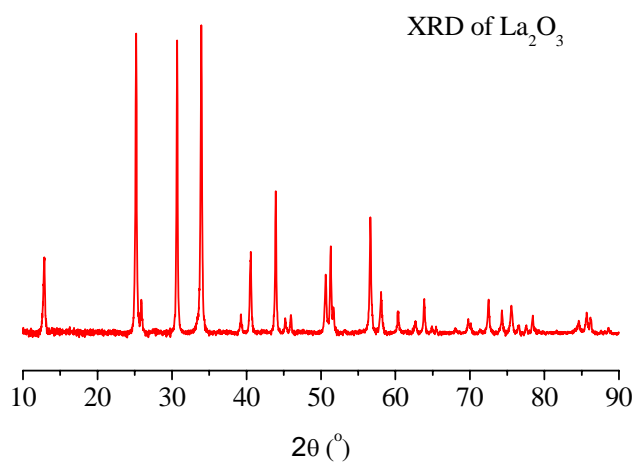

**Fig. S34** XRD of  $\text{La}_2\text{O}_3$

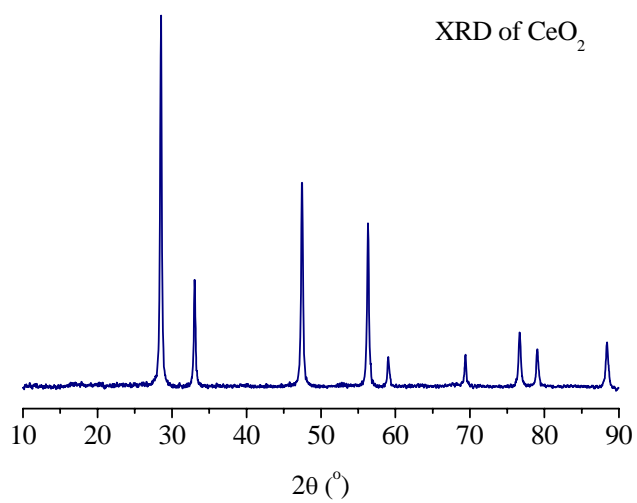

**Fig. S35** XRD of  $\text{CeO}_2$

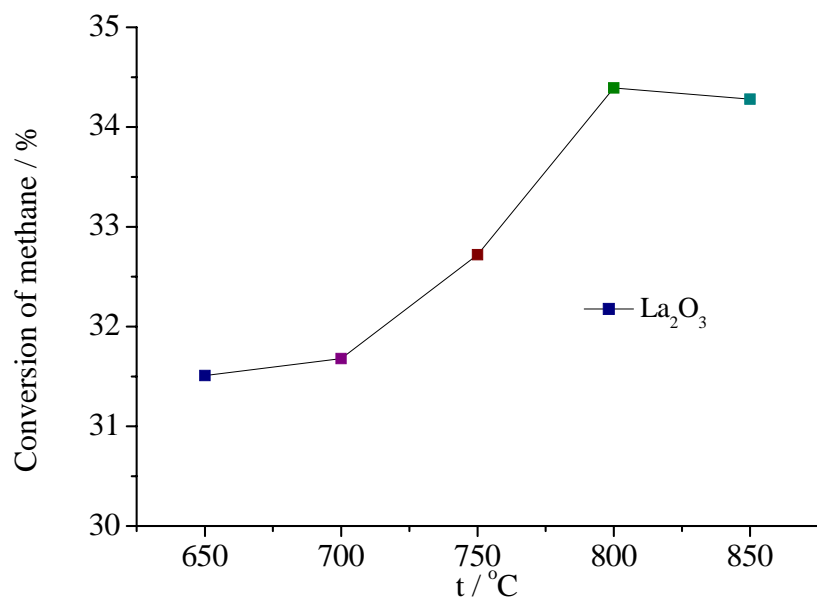

**Fig. S36** CH<sub>4</sub> conversions of OCM reaction over La<sub>2</sub>O<sub>3</sub>

‡: m<sub>cat.</sub> = 400 mg, n<sub>CH<sub>4</sub></sub>/n<sub>O<sub>2</sub></sub> = 3, GHSV = 7500 h<sup>-1</sup>

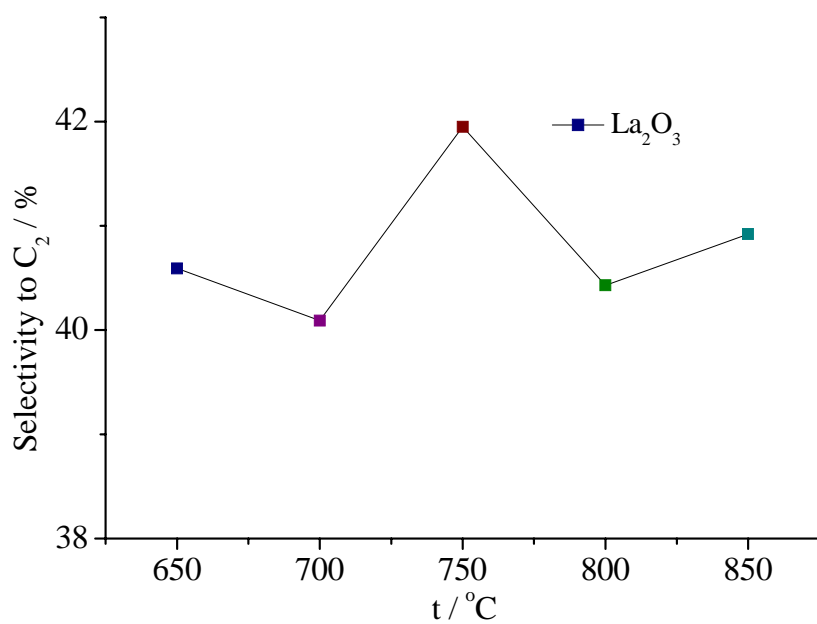

**Fig. S37** C<sub>2</sub> selectivity of OCM reaction over La<sub>2</sub>O<sub>3</sub>

‡: m<sub>cat.</sub> = 400 mg, n<sub>CH<sub>4</sub></sub>/n<sub>O<sub>2</sub></sub> = 3, GHSV = 7500 h<sup>-1</sup>

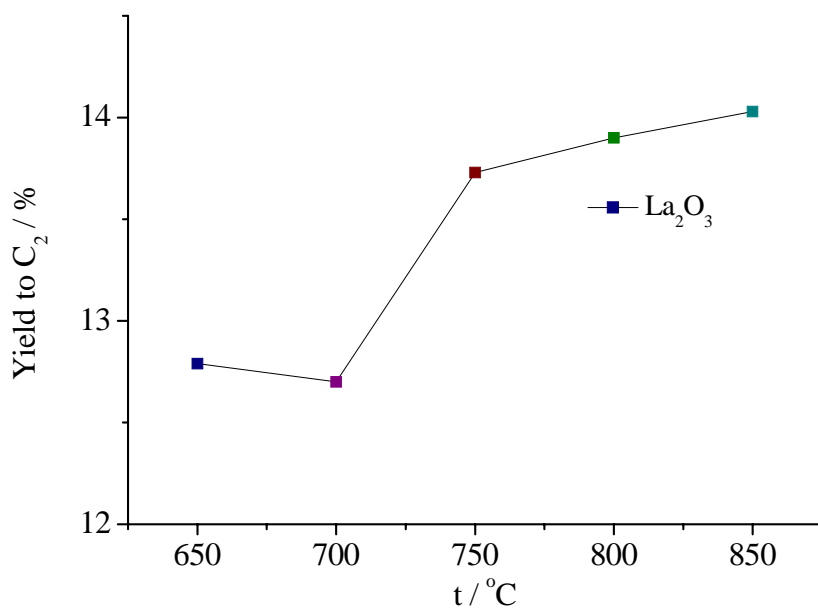

**Fig. S37** C<sub>2</sub> yield of OCM reaction over La<sub>2</sub>O<sub>3</sub>  
 ‡: m<sub>cat.</sub> = 400 mg, n<sub>CH<sub>4</sub></sub>/n<sub>O<sub>2</sub></sub> = 3, GHSV = 7500 h<sup>-1</sup>

**Table S1** <sup>13</sup>C NMR spectral data (in ppm) of complexes **2** and **5**, K<sub>3</sub>Hcit, K<sub>4</sub>edta, K<sub>2</sub>Hmal and K[Ce(edta)(H<sub>2</sub>O)<sub>3</sub>]·5H<sub>2</sub>O<sup>a</sup>

| Compound             | α-C       | α-CO <sub>2</sub> | β-CH <sub>2</sub> CO <sub>2</sub> | β-CO <sub>2</sub> |                                                          | -CH <sub>2</sub> N | -NCH <sub>2</sub> CO <sub>2</sub> | -CO <sub>2</sub> |
|----------------------|-----------|-------------------|-----------------------------------|-------------------|----------------------------------------------------------|--------------------|-----------------------------------|------------------|
| <b>2</b>             | 79.0(1.3) | 184.7(0.5)        | 47.7(-0.8)                        | 181.6(-0.1)       |                                                          | 45.2(-8.5)         | 62.4(1.3)                         | 177.6(-0.9)      |
| <b>5</b>             | 71.5(0.5) | 185.5(3.9)        | 43.3(0.8)                         | 180.9(2.1)        |                                                          | 41.3(-12.4)        | 60.4(0.3)                         | 178.4(-0.1)      |
| [Hcit] <sup>3-</sup> | 77.7      | 184.2             | 48.5                              | 181.7             | [edta] <sup>4-</sup>                                     | 53.7               | 60.1                              | 178.5            |
| [Hmal] <sup>2-</sup> | 71.0      | 181.6             | 42.5                              | 178.8             | [Ce(edta)(H <sub>2</sub> O) <sub>3</sub> ] <sup>3-</sup> | 36.6(-17.1)        | 58.4(-1.7)                        | 178.7(0.2)       |

<sup>a</sup> Δδ values are given in brackets
